# Supplementary material for: Genome-Wide Linkage Analysis and Association Study Identifies Loci for Polydactyly in Chickens
Source: PubMed Central journal article supplement (PMC4065260; doi:10.1534/g3.114.011338), 2014-04-21
Supplement: supp_g3.114.011338_FigureS1.pdf [file supp_g3.114.011338_FigureS1.pdf]

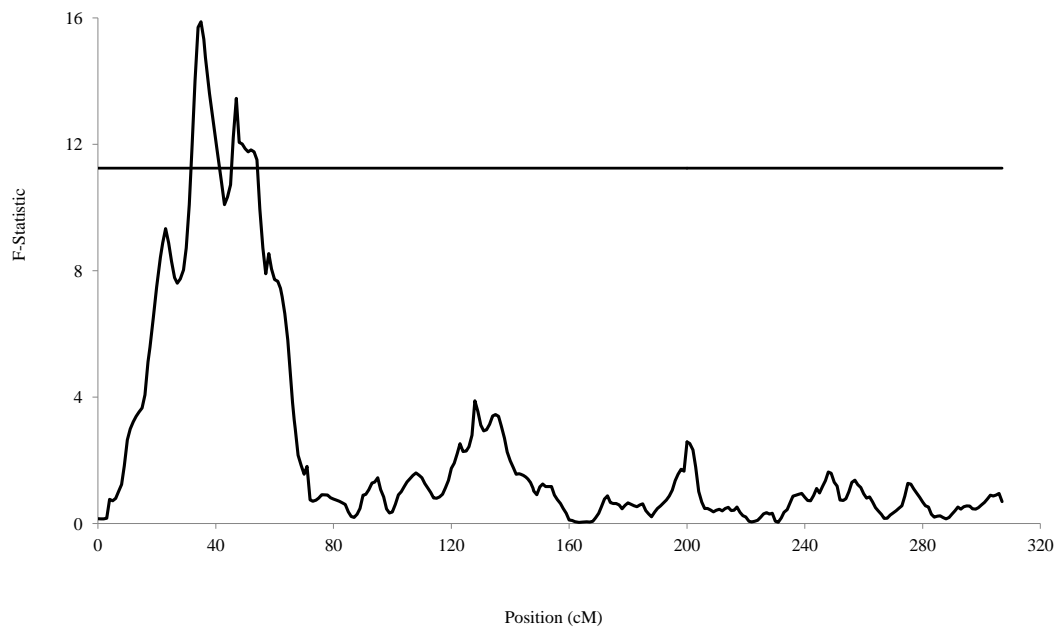

**Figure S1** Polydactyly QTL analysis on GGA2 in the CAAS chicken F2 population. The bold line shows the 1% genome-wide significance threshold.
